# Supplementary material
Source: PubMed Central journal article supplement (PMC7391141)
Supplement: advancesADV2020002123-suppl1.pdf [file advancesADV2020002123-suppl1.pdf]

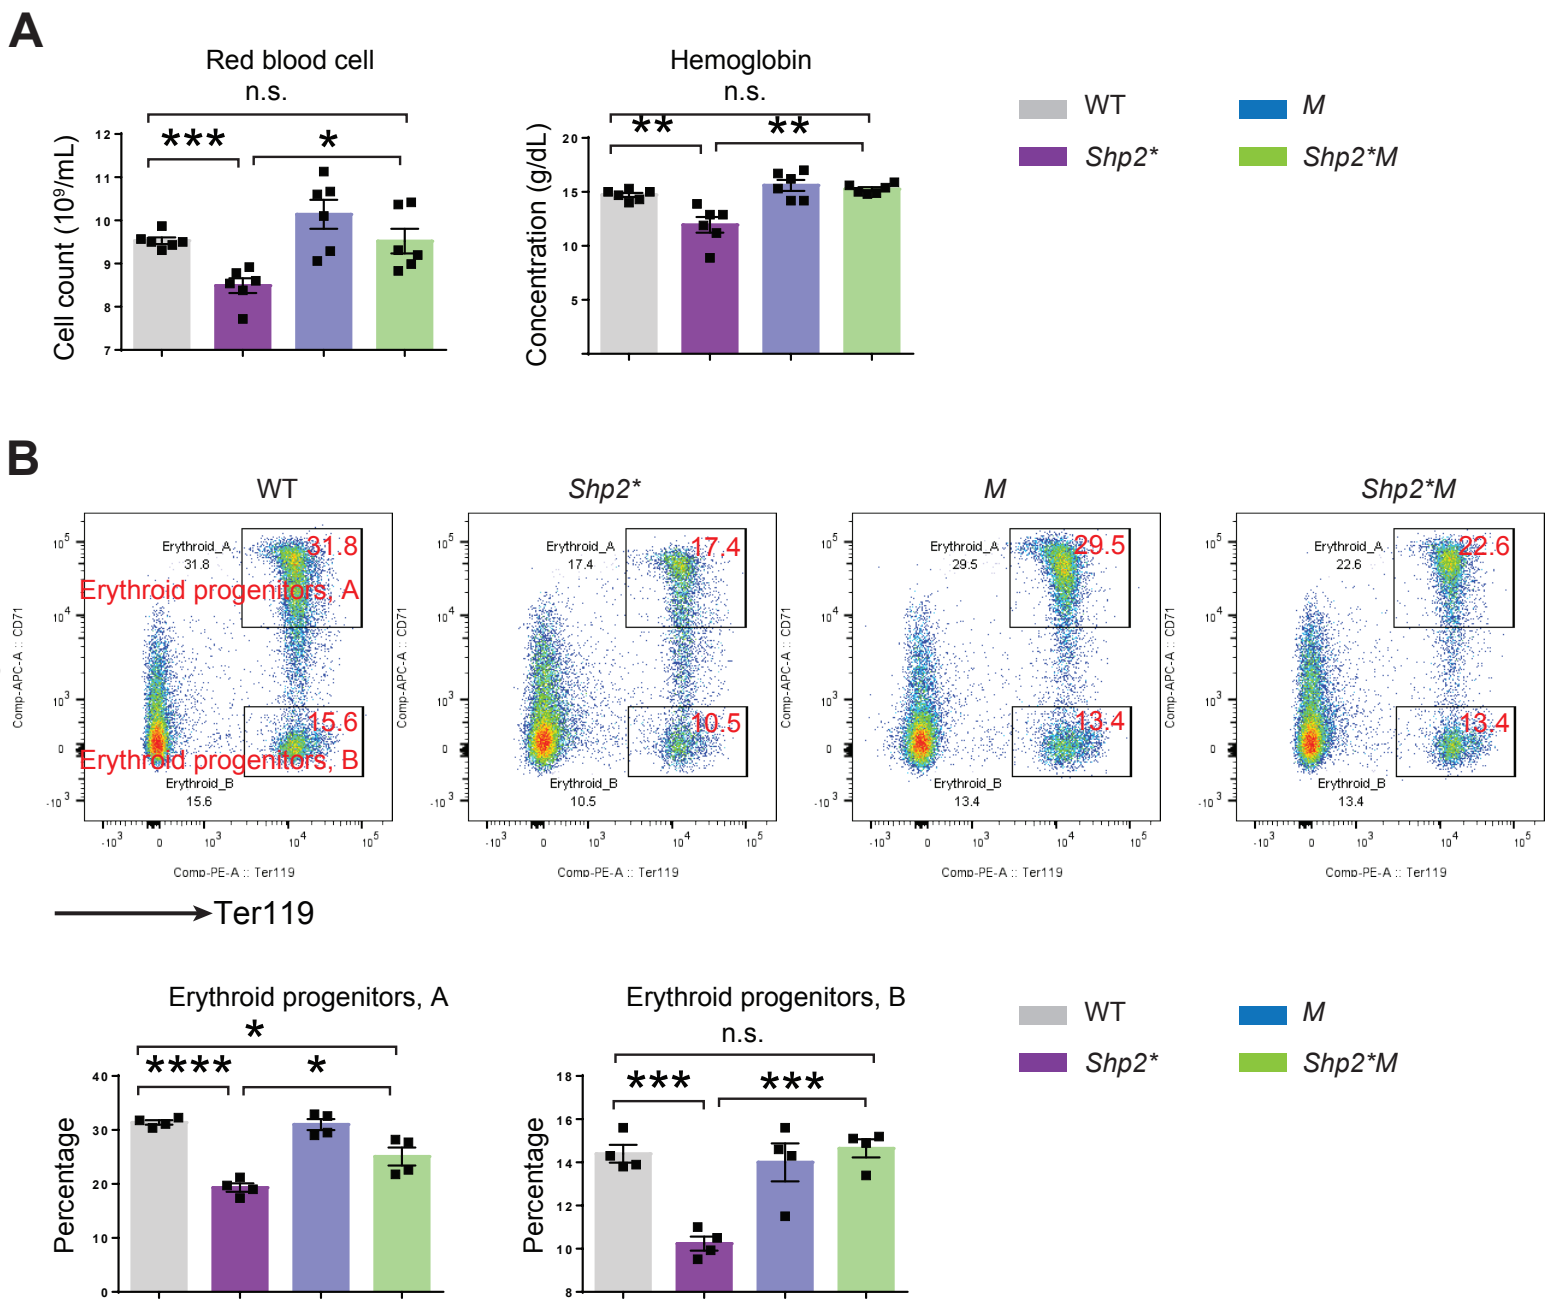

Supplemental Figure 1. Cai *et al*

**Supplemental Figure 1: Improvement of anemia in *Shp2\*M* mice.**

- (A) Red blood cell counts and hemoglobin concentration in peripheral blood.  
 (B) Flow cytometry profile and quantitative analysis of erythroid progenitor cells in bone marrow. Samples from 4 genotypes were stained with a combination of Ter119 and CD71 antibodies and subjects to flow analysis.

n= 4~6 mice. \*, p<0.05; \*\*, p<0.01; \*\*\*, p<0.001; \*\*\*\*, p<0.0001.

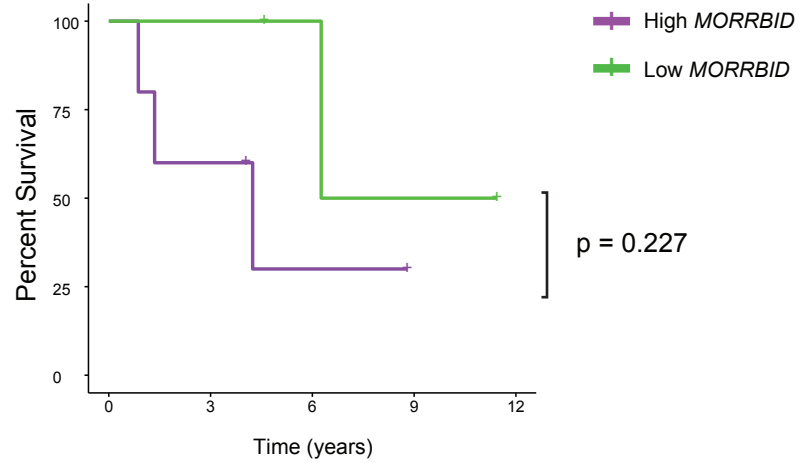

Supplemental Figure 2. Cai *et al*

**Supplemental Figure 2:** Kaplan-Meier survival plots of JMML patients with high or low expression of *MORRBID* where no *SHP2*, *KRAS* and *NRAS* mutations were detected. N=9, respectively. p=0.227.
